# Supplementary material
Source: Springer Nature journal article supplement (https://mijn.bsl.nl/resource/supplementary/13047_2013_592_MOESM4_ESM.pdf/7113170)
Supplement: MOESM4 [file 7113170]

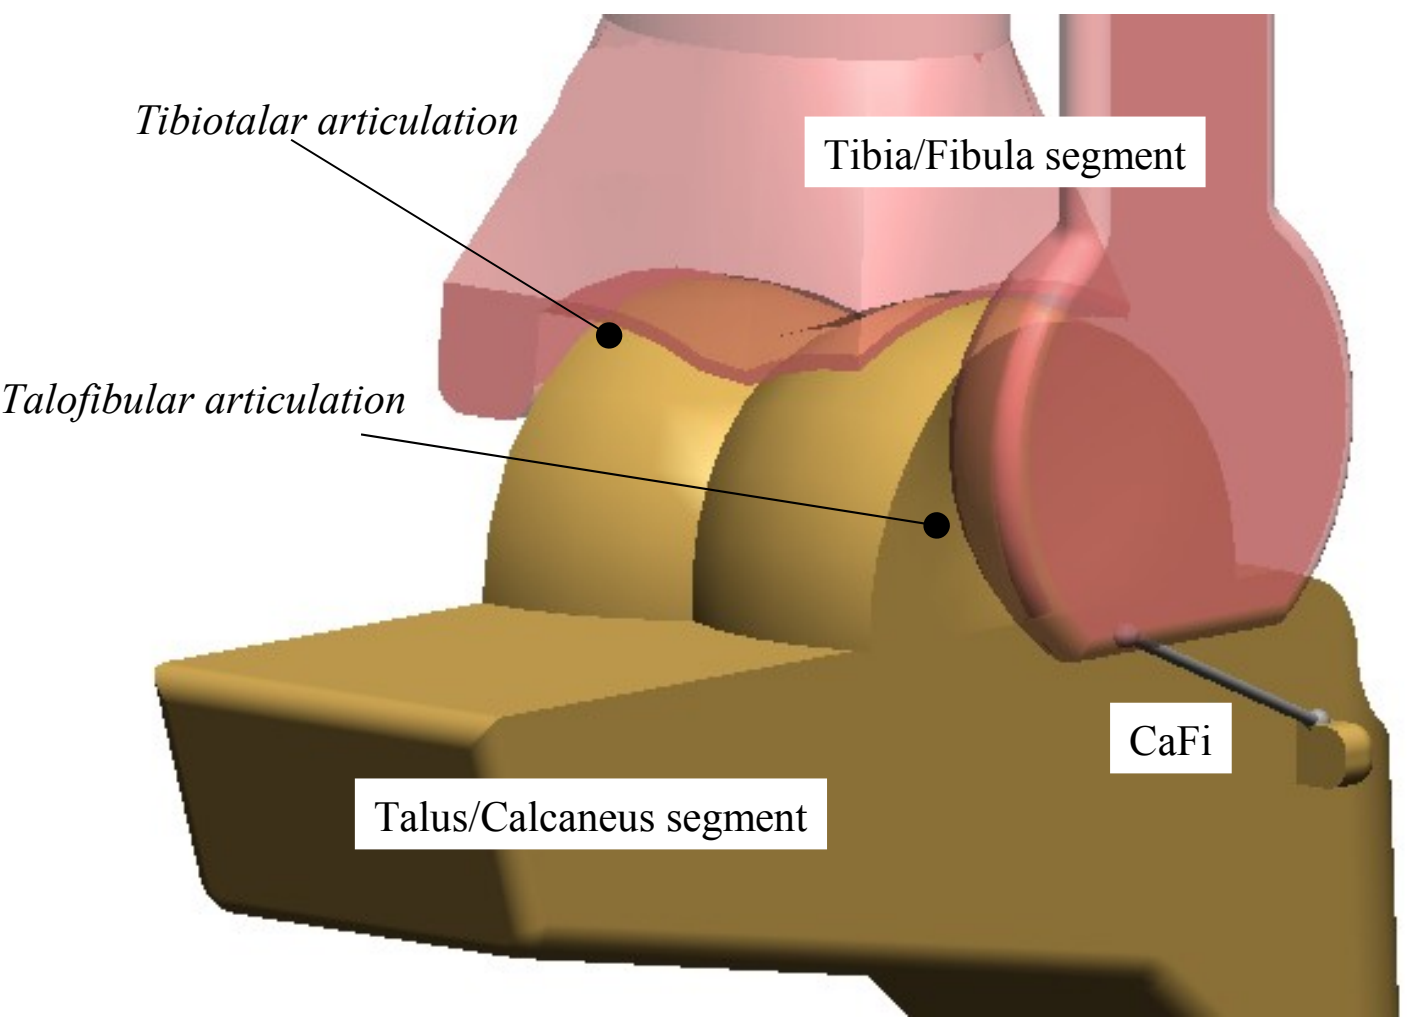

*Tibiotalar articulation*

Tibia/Fibula segment

*Talofibular articulation*

CaFi

Talus/Calcaneus segment
